# Supplementary figures and images for: Reproducible, portable, and efficient ancient genome reconstruction with nf-core/eager
Source: PeerJ journal article supplement (doi:10.7717/peerj.10947), 2021-03-16

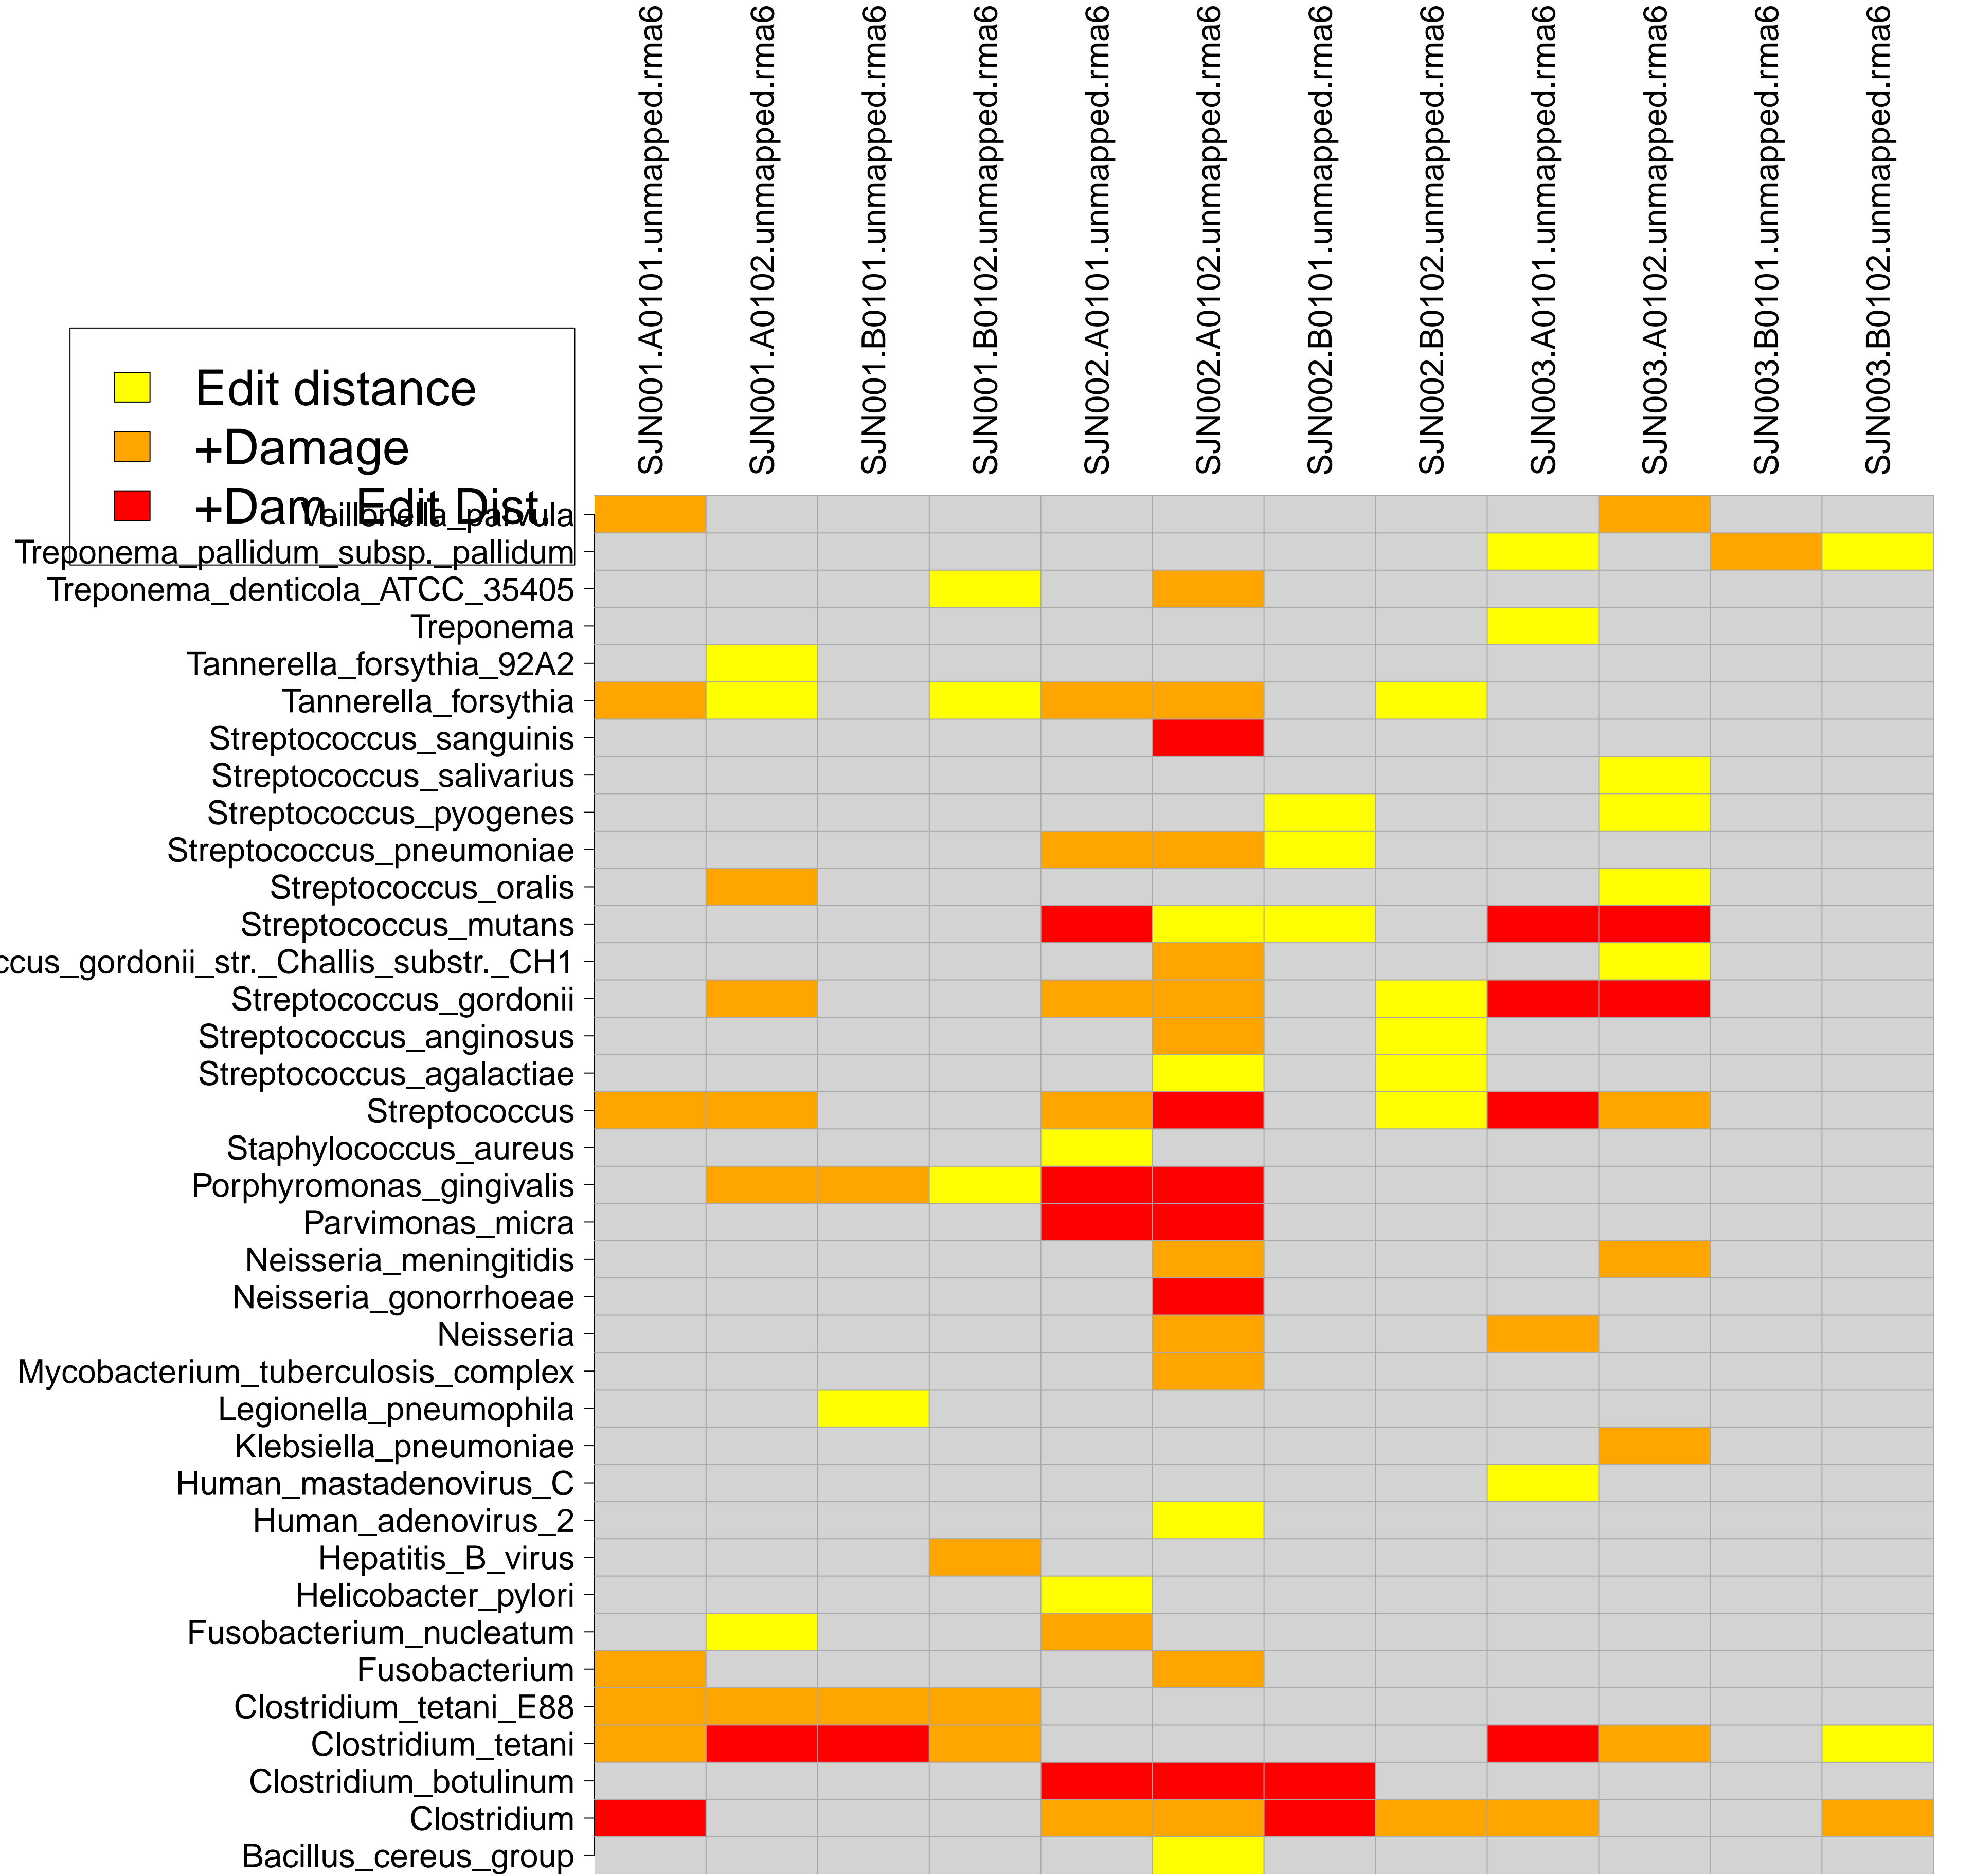

Supplement: nf-core-eager_supplement.zip [file nf-core-eager_supplement.zip]
